# Supplementary material for: Genome-wide methylation profiling and copy number analysis in atypical fibroxanthomas and pleomorphic dermal sarcomas indicate a similar molecular phenotype
Source: Springer Nature journal article supplement (doi:10.1186/s13569-019-0113-6), 2019-02-14

a HE

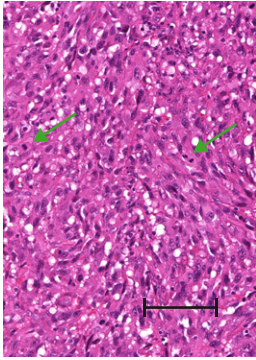

b HE

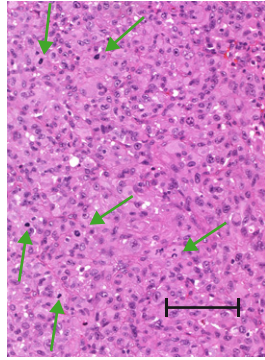

c HE

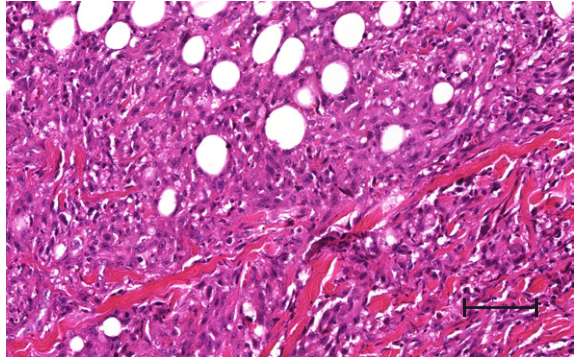

d HE

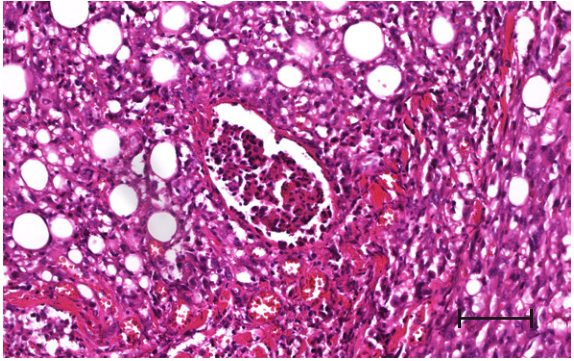

e HE

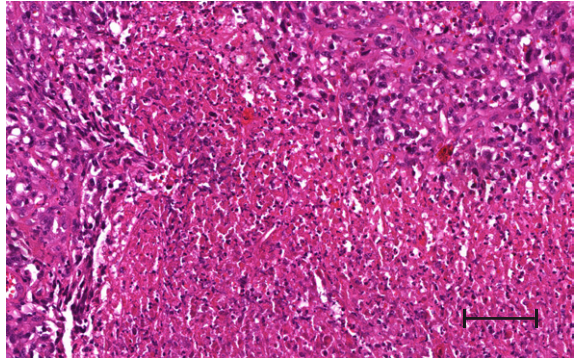

f S100

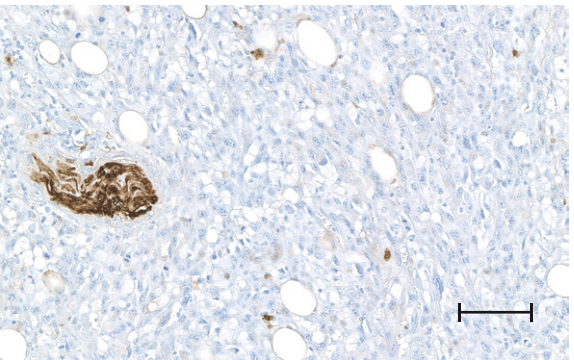

g SOX10

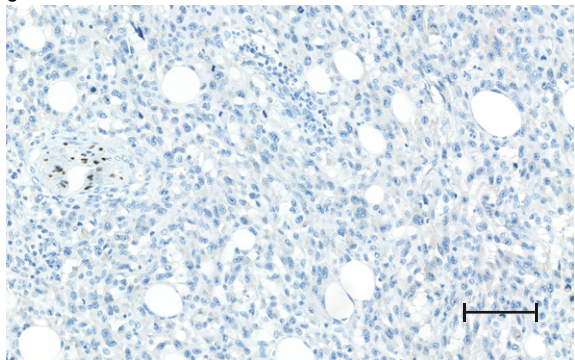

h HMB45

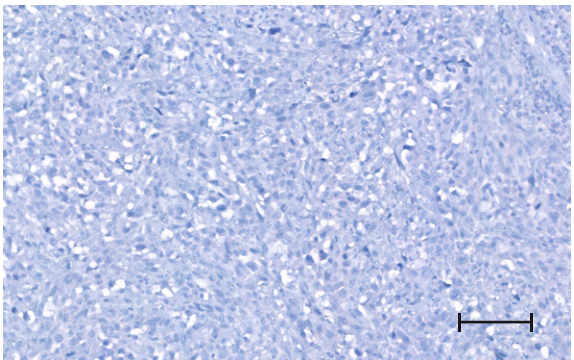

i MelanA

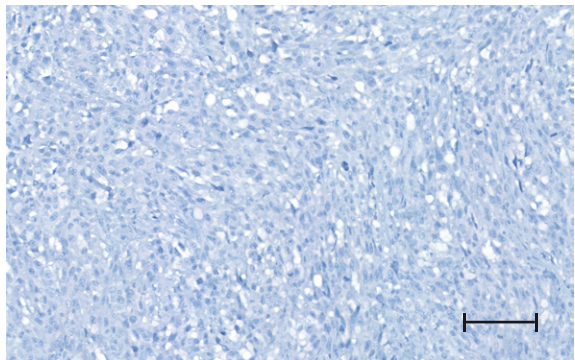

Supplement: MOESM2 [file 16481458]
