# Supplementary material for: Genome-wide methylation profiling and copy number analysis in atypical fibroxanthomas and pleomorphic dermal sarcomas indicate a similar molecular phenotype
Source: Springer Nature journal article supplement (doi:10.1186/s13569-019-0113-6), 2019-02-14

AFX 101176 with 5q21.3 amplification

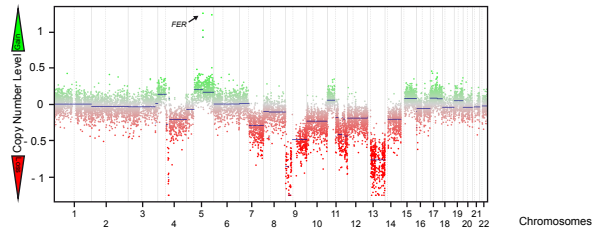

AFX 101174 with 8p11.22-23 amplification

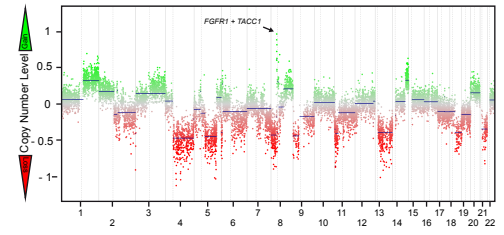

AFX 101166 with 13q34 amplification

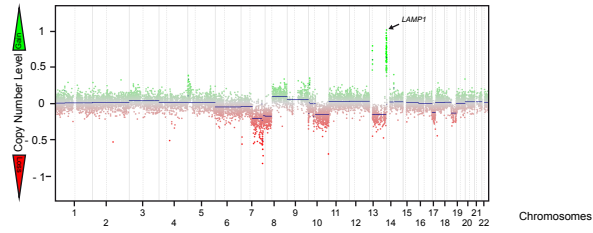

PDS 101152 with 11q13.3 amplification

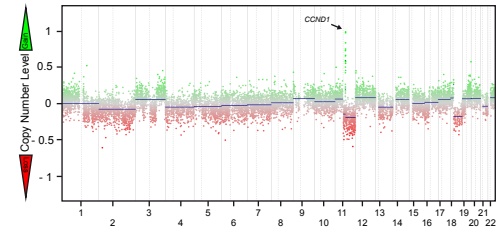

PDS 101158 with 12q24.31 amplification

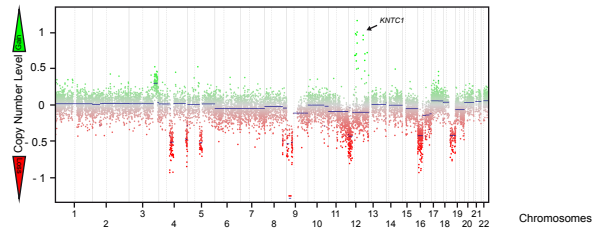

Supplement: MOESM4 [file 16481458]
